# Supplementary material for: Safety and efficacy of allogeneic natural killer cell immunotherapy on human immunodeficiency virus type 1 immunological non-responders: a brief report
Source: PubMed Central journal article supplement — Chin Med J (Engl). 2020 Nov 4;133(23):2803–7. doi: 10.1097/CM9.0000000000001189 (PMC7717728; doi:10.1097/cm9.0000000000001189), 2020-11-04
Supplement: cm9-133-2803-s001.pdf [file cm9-133-2803-s001.pdf]

Supplementary Table 1: Biological parameters profiling to control the safety of the intervention.

| Parameter                                      | Group  | Baseline       | Month 1         | Month 3        | Month 6        | Month 9        | Month 12       | Month 24       | P  |
|------------------------------------------------|--------|----------------|-----------------|----------------|----------------|----------------|----------------|----------------|----|
| WBC ( $10^9/L$ )                               | NK+ART | 5.17 ± 1.78    | 5.55 ± 1.91     | 4.73 ± 0.88    | 5.16 ± 1.65    | 5.07 ± 1.71    | 4.79 ± 1.23    | 5.01 ± 1.48    | ns |
|                                                | ART    | 5.11 ± 1.13    | 5.15 ± 1.04     | 5.24 ± 1.36    | 4.68 ± 0.77    | 4.76 ± 0.73    | 4.72 ± 1.02    | 5.13 ± 1.36    |    |
| LYM ( $10^9/L$ )                               | NK+ART | 1.58 ± 0.65    | 1.60 ± 0.71     | 1.37 ± 0.57    | 1.43 ± 0.62    | 1.44 ± 0.49    | 1.4 ± 0.5      | 1.73 ± 1.16    | ns |
|                                                | ART    | 1.37 ± 0.64    | 1.49 ± 0.68     | 1.25 ± 0.48    | 1.49 ± 0.55    | 1.31 ± 0.39    | 1.28 ± 0.39    | 1.22 ± 0.46    |    |
| RBC ( $10^{12}/L$ )                            | NK+ART | 4.49 ± 0.52    | 4.36 ± 0.64     | 4.43 ± 0.63    | 4.42 ± 0.54    | 4.49 ± 0.78    | 4.31 ± 0.44    | 4.69 ± 0.74    | ns |
|                                                | ART    | 4.42 ± 0.48    | 4.35 ± 0.52     | 4.49 ± 0.52    | 4.57 ± 0.48    | 4.38 ± 0.47    | 4.47 ± 0.51    | 4.41 ± 0.44    |    |
| HGB (g/L)                                      | NK+ART | 149.31 ± 6.90  | 147.42 ± 13.95  | 149.52 ± 13.01 | 150.60 ± 7.82  | 148.63 ± 14.48 | 147.62 ± 5.58  | 154.21 ± 13.46 | ns |
|                                                | ART    | 135.23 ± 20.66 | 134.62 ± 19.17  | 140.64 ± 14.98 | 142.00 ± 15.30 | 139.73 ± 14.88 | 140.61 ± 14.42 | 132.72 ± 22.36 |    |
| PLT ( $10^9/L$ )                               | NK+ART | 223.35 ± 99.79 | 232.42 ± 114.73 | 233.71 ± 95.92 | 208.91 ± 74.66 | 208.05 ± 86.46 | 211.23 ± 66.99 | 234.34 ± 77.92 | ns |
|                                                | ART    | 234.34 ± 45.62 | 230.03 ± 25.66  | 248.74 ± 31.21 | 255.14 ± 32.68 | 267.55 ± 72.31 | 264.37 ± 55.25 | 264.47 ± 34.58 |    |
| ALT (U/L)                                      | NK+ART | 16.00 ± 5.16   | 18.00 ± 11.32   | 19.10 ± 6.44   | 19.40 ± 7.41   | 20.60 ± 8.21   | 19.30 ± 8.96   | 21.50 ± 8.92   | ns |
|                                                | ART    | 15.50 ± 8.30   | 16.80 ± 10.93   | 15.60 ± 7.68   | 16.50 ± 6.09   | 18.40 ± 9.18   | 17.00 ± 7.51   | 17.00 ± 7.47   |    |
| AST (U/L)                                      | NK+ART | 19.00 ± 6.75   | 19.90 ± 10.28   | 21.10 ± 7.17   | 20.20 ± 7.12   | 21.40 ± 6.65   | 23.50 ± 13.82  | 21.30 ± 7.60   | ns |
|                                                | ART    | 16.30 ± 6.08   | 18.60 ± 8.76    | 16.80 ± 5.39   | 17.50 ± 4.69   | 19.50 ± 7.01   | 18.90 ± 6.69   | 18.50 ± 7.50   |    |
| TBIL ( $\mu\text{mol}/L$ )                     | NK+ART | 13.15 ± 5.29   | 15.34 ± 7.23    | 14.77 ± 6.67   | 14.30 ± 6.83   | 12.66 ± 7.31   | 13.72 ± 7.82   | 14.65 ± 7.76   | ns |
|                                                | ART    | 11.61 ± 4.31   | 13.34 ± 3.55    | 10.80 ± 3.40   | 12.04 ± 4.60   | 10.83 ± 2.74   | 11.67 ± 3.93   | 11.72 ± 3.96   |    |
| Cr ( $\mu\text{mol}/L$ )                       | NK+ART | 71.20 ± 9.89   | 72.00 ± 11.56   | 73.20 ± 11.26  | 76.00 ± 11.24  | 78.60 ± 10.00  | 73.70 ± 11.76  | 67.90 ± 8.19   | ns |
|                                                | ART    | 63.80 ± 9.45   | 68.10 ± 10.52   | 69.30 ± 9.32   | 66.80 ± 8.97   | 71.30 ± 10.37  | 68.80 ± 10.92  | 62.50 ± 12.76  |    |
| eGFR ( $\text{mL}/\text{min}/1.73\text{m}^2$ ) | NK+ART | 100.50 ± 8.65  | 98.98 ± 8.29    | 98.54 ± 9.29   | 96.85 ± 12.33  | 98.43 ± 11.77  | 99.81 ± 12.91  | 104.10 ± 8.55  | ns |
|                                                | ART    | 104.30 ± 9.75  | 100.81 ± 11.72  | 99.94 ± 5.69   | 102.00 ± 9.29  | 97.43 ± 11.23  | 100.80 ± 9.32  | 104.50 ± 9.80  |    |

Data expressed as mean ± standard deviation. ns: no significance. NK: Allogeneic NK cell immunotherapy; ART: Antiretroviral therapy; WBC: White blood cell; LYM: Lymphocyte; RBC: Red blood cell; HGB: Hemoglobin; PLT: Platelet; ALT: Alanine aminotransferase; AST: Aspartate aminotransferase; TBIL: Total bilirubin; Cr: Creatine; eGFR: Estimated glomerular filtration rate.
